# Supplementary material for: Adaptive social contact rates induce complex dynamics during epidemics
Source: PubMed Central journal article supplement (PMC7875423; doi:10.1371/journal.pcbi.1008639), 2021-02-10
Supplement: pcbi.1008639.s001.pdf [file pcbi.1008639.s001.pdf]

## S1 Appendix. Local stability of $\hat{I}$

Recall the recursion (11):

$$I_{t+1} = I_t^2 \left( \frac{b_0 \alpha}{N} I_{t-\Delta} - b_0 \hat{c} \right) + \hat{I} (N b_0 c + 1 - \gamma - b_0 \alpha I_{t-\Delta}). \quad (\text{A1})$$

In the neighborhood of the equilibrium  $\hat{I}$ , write  $I_t = \hat{I} + \varepsilon_t$  and  $I_{t-\Delta} = \hat{I} + \varepsilon_{t-\Delta}$ , where  $\varepsilon_t$  and  $\varepsilon_{t-\Delta}$  are small enough that quadratic terms in them can be neglected in the expression for  $I_{t+1} = \hat{I} + \varepsilon_{t+1}$ . The linear approximation to (A1) is then

$$\begin{aligned} \varepsilon_{t+1} = \varepsilon_t & \left[ \frac{2b_0 \alpha}{N} \hat{I}^2 - \hat{I} (2b_0 \hat{c} + b_0 \alpha) + N b_0 \hat{c} + 1 - \gamma \right] \\ & + \varepsilon_{t-\Delta} \left( \frac{b_0 \alpha}{N} \hat{I}^2 - b_0 \alpha \hat{I} \right), \end{aligned} \quad (\text{A2})$$

and in the case  $\Delta = 0$ , this reduces to

$$\varepsilon_{t+1} = \varepsilon_t \left[ N b_0 \hat{c} + 1 - \gamma - 2b_0 \hat{I} (\hat{c} + \alpha) + \frac{3b_0 \alpha}{N} \hat{I}^2 \right]. \quad (\text{A3})$$

We focus first on  $\Delta = 0$  and write (A3) as  $\varepsilon_{t+1} = \varepsilon_t L(\hat{I})$ . Recall that  $\hat{I}$  satisfies Eq. (17), and substituting  $\gamma$  from (17) into  $L(\hat{I})$ , we obtain

$$L(\hat{I}) = 1 - b_0 \hat{I} \left( \alpha + \hat{c} - \frac{2\alpha \hat{I}}{N} \right) = 1 - b_0 H(\hat{I}), \quad (\text{A4})$$

where

$$H(\hat{I}) = \hat{I} \left( \alpha + \hat{c} - \frac{2\alpha \hat{I}}{N} \right). \quad (\text{A5})$$

Clearly  $N \geq \hat{I}$ , and since  $c^*$  must be positive,  $\hat{c} > \alpha \hat{I}/N$ . Hence  $H(\hat{I}) > 0$  and, for local stability of  $\hat{I}$ , the remaining condition for  $|L(\hat{I})| < 1$  is  $b_0 H(\hat{I}) < 2$ . Direct substitution of  $\hat{I}$  gives  $b_0 H(\hat{I}) < 2$  if

$$b_0 \hat{I} \sqrt{(\alpha - \hat{c})^2 + \frac{4\alpha \gamma}{b_0 N}} < 2. \quad (\text{A6})$$

Now we turn to the general case  $\Delta \neq 0$  and Eq. (A2), which we write as

$$\varepsilon_{t+1} = A \varepsilon_t + B \varepsilon_{t-\Delta}, \quad (\text{A7})$$

where  $A$  and  $B$  are the corresponding terms on the right side of (A2). Eq. (A7) is a homogeneous linear recursion, since, given  $\hat{I}$  and all the parameters,  $A$  and  $B$  are constants with respect to time. Local stability of  $\hat{I}$  is then determined by the properties of recursion (A7), whose solution first involves solving its characteristic equation

$$\lambda^{\Delta+1} = A \lambda^\Delta + B. \quad (\text{A8})$$

In principle there are  $\Delta + 1$  real or complex roots of (A8), which we represent as  $\lambda_1, \lambda_2, \dots, \lambda_{\Delta+1}$ , and the solution of (A7) can be written as

$$\varepsilon_t = c_1 \lambda_1^t + c_2 \lambda_2^t + \dots + c_{\Delta+1} \lambda_{\Delta+1}^t, \quad (\text{A9})$$

where  $c_i$  are found from the initial conditions. Convergence to, and hence local stability of  $\hat{I}$ , is determined by the magnitude of the absolute value (if real) or modulus (if

complex) of the roots  $\lambda_1, \lambda_2, \dots, \lambda_{\Delta+1}$ :  $\hat{I}$  is locally stable if the largest among the  $\Delta + 1$  of these is less than unity.

In Table 2, results of numerically iterating the complete recursion (11) are listed for the delay  $\Delta$  varying from  $\Delta = 0$  to  $\Delta = 4$ , all starting from  $I_0 = 1$ , with  $N = 10,000$  and the stated parameters. Figure 3 illustrates the discrete- and continuous-time dynamics summarized in Table 2. With these values,  $\hat{I} = 35.7180$  and we obtain  $A = 0.9997$  and  $B = -0.6673$ . Then, for  $\Delta = 0$ , Eq. (A7) gives  $\varepsilon_t = 0.3324\varepsilon_{t-1}$ , which entails that convergence to  $\hat{I}$  is locally monotone. With  $\Delta = 1$ , the characteristic polynomial is a quadratic,

$$\lambda^2 = 0.9997\lambda - 0.6673, \quad (\text{A10})$$

with complex roots  $0.4999 \pm 0.6461i$  whose modulus is 0.8169, which is less than 1. The complexity implies cyclic behavior, and since the modulus is less than one, we see locally damped oscillatory convergence to  $\hat{I}$ .

For  $\Delta = 2$ , the characteristic equation is the cubic

$$\lambda^3 = 0.9997\lambda^2 - 0.6673, \quad (\text{A12})$$

which has one real root 0.6383 and complex roots  $0.8190 \pm 0.6122i$ . Here the modulus of the complex roots is 1.0225, which is greater than unity so that  $\hat{I}$  is not locally stable. In this case the dynamics depend on the initial value  $I_0$ . If  $I_0 < 72$ ,  $I_t$  oscillates but not in a stable cycle. If  $I_0 > 73$ , the oscillation becomes unbounded.

When  $\Delta = 3$ , the four roots of the characteristic polynomial

$$\lambda^4 = 0.9997\lambda^3 - 0.6673 \quad (\text{A13})$$

are all complex:  $-0.4566 \pm 0.5966i$  and  $0.9564 \pm 0.5173i$ . The modulus of the second pair of complex roots is greater than 1. For  $\Delta = 4$ , the five roots of

$$\lambda^5 = 0.9997\lambda^4 - 0.6673 \quad (\text{A14})$$

are  $-0.7823$ ,  $-0.1301 \pm 0.8212i$ , and  $1.0211 \pm 0.4376i$ . Here again the largest modulus is 1.1109, greater than 1. Thus for both  $\Delta = 3$  and 4,  $\hat{I}$  cannot be locally stable, and for these delay times the recursion can oscillate wildly becoming negatively and positively unbounded for some starting values  $I_0$ .
